# Supplementary material for: Improving patient safety through better teamwork: how effective are different methods of simulation debriefing? Protocol for a pragmatic, prospective and randomised study
Source: PubMed Central journal article supplement — BMJ Open. 2017 Jun 30;7(6):e015977. doi: 10.1136/bmjopen-2017-015977 (PMC5726131; doi:10.1136/bmjopen-2017-015977), 2017-06-30
Supplement: bmjopen-2017-015977supp001.pdf [file bmjopen-2017-015977supp001.pdf]

# Team Emergency Assessment Measure (TEAM)

## Einleitung

Dieser Fragebogen zu nicht-medizinischen Fähigkeiten wurde als Beobachtungsbogen für die valide, reliable und praktikable Bewertung von Notfallmedizinischen Teams (z.B. Reanimations- und Traumateams) entwickelt. Der Fragebogen sollte von erfahrenen Klinikerinnen und Klinikern ausgefüllt werden, um akkurate Performanzmessungen und Feedback zur Führungsrolle, Teamarbeit, zum Situationsbewusstsein und Aufgabenmanagement zu ermöglichen. Wo zutreffend, sind Hinweise zur Bewertung angegeben. Die folgende Skala liegt der Bewertung zugrunde:

|                |        |                             |     |                  |
|----------------|--------|-----------------------------|-----|------------------|
| nie / fast nie | selten | ca. in der Hälfte der Fälle | oft | immer/fast immer |
| 0              | 1      | 2                           | 3   | 4                |

## Angaben zum Team

Datum: \_\_\_\_\_ Uhrzeit: \_\_\_\_\_ Ort: \_\_\_\_\_  
 Teamleiter: \_\_\_\_\_ Team: \_\_\_\_\_

**Führungsrolle: Es wird angenommen, dass die Teamleitung entweder benannt ist, aus der Situation entsteht oder die/der Erfahrenste ist - falls keine Teamleitung besteht, vergeben Sie „0“ für Frage 1 und 2.**      0 1 2 3 4

**1. Die Teamleitung ließ durch Anweisungen das Team wissen, was von ihm erwartet wurde.**     

**2. Die Teamleitung behielt eine globale Perspektive.**  
*Hinweise: Überwachung klinischer Maßnahmen und der Umgebung? Versucht, wenn möglich keine praktischen Aufgaben zu übernehmen ('Hands off')? Angemessene Delegation von Aufgaben.*     

**Teamarbeit: Bewertungen sollten (mehr oder weniger) das Team als Ganzes umfassen, also Leitung und andere Mitglieder als Kollektiv.**      0 1 2 3 4

**3. Das Team kommunizierte effektiv.**  
*Hinweise: Verbale, non-verbale und schriftliche Kommunikationsformen?*     

**4. Das Team arbeitete zusammen um die Aufgaben zeitnah zu lösen.**     

**5. Das Team agierte gefasst und kontrolliert.**  
*Hinweise: angebrachte Emotionen? Probleme beim Konfliktmanagement?*     

**6. Die Einstellung des Teams war positiv.**  
*Hinweise: angemessene Unterstützung, Zuversicht, Stimmung, Optimismus, Entschlossenheit?*     

**7. Das Team passte sich an sich verändernde Situationen an.**  
*Hinweise: Anpassung innerhalb der beruflichen Rolle?  
 Situationsänderung: Zustandsverschlechterung des Patienten? Veränderungen im Team?*     

**8. Das Team überwachte und re-evaluierte die Situation.**     

**9. Das Team antizipierte potentiell nötige Maßnahmen.**  
*Hinweise: Vorbereitung der/s Defibrillators, Medikamente, Atemwegsmaterial?*     

**Aufgabenmanagement:**      0 1 2 3 4

**10. Das Team priorisierte die Aufgaben.**     

**11. Das Team folgte anerkannten Standards und Leitlinien.**  
*Hinweise: Sind Abweichungen möglicherweise angebracht?*     

**Gesamtleistung:**      1 2 3 4 5 6 7 8 9 10

**12. Vergeben Sie eine Gesamtbewertung für die nicht-medizinischen Fähigkeiten des Teams auf einer Skala von 1-10**     

**Kommentare:** \_\_\_\_\_
