# Supplementary material for: Improving patient safety through better teamwork: how effective are different methods of simulation debriefing? Protocol for a pragmatic, prospective and randomised study
Source: PubMed Central journal article supplement — BMJ Open. 2017 Jun 30;7(6):e015977. doi: 10.1136/bmjopen-2017-015977 (PMC5726131; doi:10.1136/bmjopen-2017-015977), 2017-06-30
Supplement: bmjopen-2017-015977supp002.pdf [file bmjopen-2017-015977supp002.pdf]

## TeamTAG

| Key principle                        | Behavioral Marker                                                                                                                                                                                                                                                                                                                                                                                                                                                                                                                                                 | <input type="checkbox"/>                                                                                                                                                                             | Notes |
|--------------------------------------|-------------------------------------------------------------------------------------------------------------------------------------------------------------------------------------------------------------------------------------------------------------------------------------------------------------------------------------------------------------------------------------------------------------------------------------------------------------------------------------------------------------------------------------------------------------------|------------------------------------------------------------------------------------------------------------------------------------------------------------------------------------------------------|-------|
| Anticipate & Plan ahead              | <ul style="list-style-type: none"> <li>- agree on a plan with all team members</li> <li>- think ahead and plan for all contingencies</li> <li>- prepare a Plan B</li> </ul>                                                                                                                                                                                                                                                                                                                                                                                       | <input type="checkbox"/><br><input type="checkbox"/><br><input type="checkbox"/>                                                                                                                     |       |
| Set priorities dynamically           | <ul style="list-style-type: none"> <li>- identify and set priorities at the beginning</li> <li>- pay attention towards changes which might become necessary / do not hold on to outdated concepts</li> </ul>                                                                                                                                                                                                                                                                                                                                                      | <input type="checkbox"/><br><input type="checkbox"/>                                                                                                                                                 |       |
| Call for help early                  | <ul style="list-style-type: none"> <li>- be aware of your own limits &amp; the limits of your team</li> <li>- set predefined criteria for asking for help</li> <li>- know who and how you can call for help</li> </ul>                                                                                                                                                                                                                                                                                                                                            | <input type="checkbox"/><br><input type="checkbox"/><br><input type="checkbox"/>                                                                                                                     |       |
| Exercise leadership and followership | <ul style="list-style-type: none"> <li>- as team leader:                             <ul style="list-style-type: none"> <li>• allocate team roles &amp; tasks</li> <li>• monitor progress</li> <li>• pay attention to team members</li> <li>• collect all information &amp; make sure everyone is on the same page</li> </ul> </li> <li>- as a team member:                             <ul style="list-style-type: none"> <li>• be present and alert</li> <li>• share your thoughts/doubts</li> <li>• show appropriate self-care behavior</li> </ul> </li> </ul> | <input type="checkbox"/><br><input type="checkbox"/><br><input type="checkbox"/><br><input type="checkbox"/><br><br><input type="checkbox"/><br><input type="checkbox"/><br><input type="checkbox"/> |       |
| Communicate effectively              | <ul style="list-style-type: none"> <li>- clear, assertive</li> <li>- use Closed-Loop-Communication</li> <li>- team leader receives all information</li> </ul>                                                                                                                                                                                                                                                                                                                                                                                                     | <input type="checkbox"/><br><input type="checkbox"/><br><input type="checkbox"/>                                                                                                                     |       |
| Re-evaluate repeatedly               | <ul style="list-style-type: none"> <li>- review the plan regularly, if / how it works</li> <li>- respond to new information / arising problems etc.</li> </ul>                                                                                                                                                                                                                                                                                                                                                                                                    | <input type="checkbox"/><br><input type="checkbox"/>                                                                                                                                                 |       |
